# Supplementary material for: Bulk Ti2Nb10O29as long-life and high-power Li-ion battery anodes
Source: Royal Society of Chemistry journal article supplement (doi:10.1039/c4ta04184d), 2014-09-03
Supplement: c4ta04184d1.pdf [file c4ta04184d1.pdf]

Electronic Supplementary Material (ESI) for  
This journal is © The Royal Society of Chemistry 2014

## Supporting Information

### Bulk $\text{Ti}_2\text{Nb}_{10}\text{O}_{29}$ as Long-Life and High-Power Li-ion Battery Anodes

Qiushi Cheng,<sup>a</sup> Jianwen Liang,<sup>a</sup> Yongchun Zhu,<sup>\*a</sup> Lulu Si,<sup>a</sup> Cong Guo<sup>a</sup> and Yitai Qian<sup>\*ab</sup>

<sup>a</sup> Hefei National Laboratory for Physical Science at Micro-scale, Department of Chemistry, University of Science and Technology of China, Hefei, Anhui 230026, P. R. China. E-mail: ychzhu@ustc.edu.cn, ytqian@ustc.edu.cn; Tel: +86-551-63601589

<sup>b</sup> School of Chemistry and Chemical Engineering, Shandong University, Jinan, 250100, P. R. China. E-mail: ytqian@ustc.edu.cn; Tel: +86-551-63607234

#### Experimental section

**Characterizations.** The as-prepared products were characterized by XRD (Philips X' Pert Super diffractometer, Cu Ka,  $\lambda=1.54178$  Å), SEM (JEOL-JSM-6700F), HRTEM and SAED (JEOL-2010), Differential thermal analysis (DTA) was measured in air from room temperature to 1300 °C with a heating rate of 10 °C min<sup>-1</sup>. Raman spectra was tested by using a JYLABRAM-HR Confocal Laser Micro-Raman spectrometer. Inductively coupled plasma (ICP) atomic emission spectrometer (PerkinElmer Instruments) was conducted to measure the ratio of metal atoms. The elements distribution of the sample was detected by energy-dispersive X-ray spectrometry (EDX) elemental mapping analysis (JEM-ARM 200F).

**Electrochemical measurements.** Electrochemical experiments were tested by using CR2016 coin cells. The electrodes were prepared by mixing the obtained materials, super P and PVDF binder dispersed in N-methylpyrrolidone (NMP) at a weight ratio of 70:20:10. Firstly, the active material and super P were mixed thoroughly, then the binder was added and the mass mixed again. The obtained slurry was coated on Cu foil and dried at 110 °C for 10 h in vacuum. The loading of active materials was 1.0-2.5 mg cm<sup>-2</sup>. The LiFePO<sub>4</sub> cathode was coated on Al foil. For the  $\text{Ti}_2\text{Nb}_{10}\text{O}_{29}$ /LiFePO<sub>4</sub> full-cell, the anode is limited and the weight ratio of LiFePO<sub>4</sub> and  $\text{Ti}_2\text{Nb}_{10}\text{O}_{29}$  is 2.9:1. The capacity of the full-cell was calculated according to the mass of the  $\text{Ti}_2\text{Nb}_{10}\text{O}_{29}$  electrode. The electrolyte used for testing was 1 M LiPF<sub>6</sub> in 1:1 EC/DEC and the separator was Celgard 2400. The cells were assembled in an argon-filled glove, and then aged for 12 h before

testing to guarantee full access of the electrolyte with electrode.

Galvanostatic discharge-charge experiments were conducted on a battery-testing system (Land-CT2001A) in the voltage range of 1.0-2.4 V at room temperature.

Cyclic voltammograms (CVs) were tested by CHI660D electrochemical workstation.

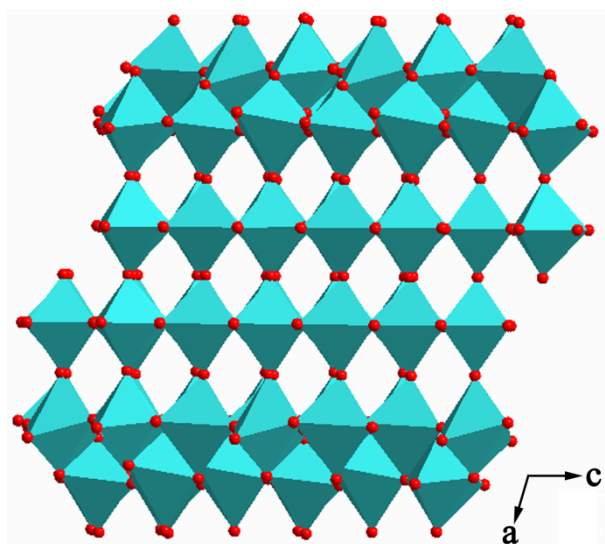

Fig. S1 Crystal structure view of  $\text{Ti}_2\text{Nb}_{10}\text{O}_{29}$ .

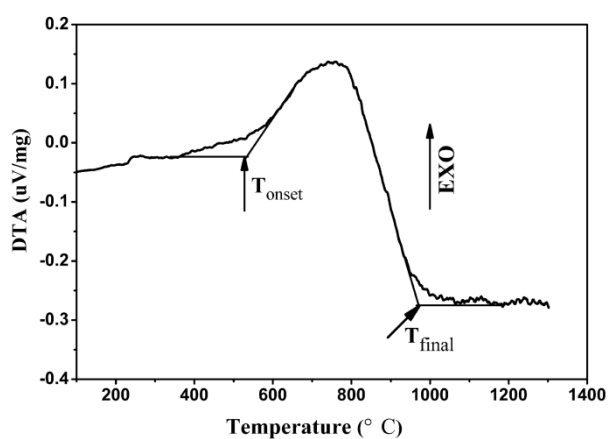

Fig. S2 DTA of the  $\text{Ti}_2\text{Nb}_{10}\text{O}_{29}$  with a heating rate  $10^\circ\text{C min}^{-1}$  in a flow of air.

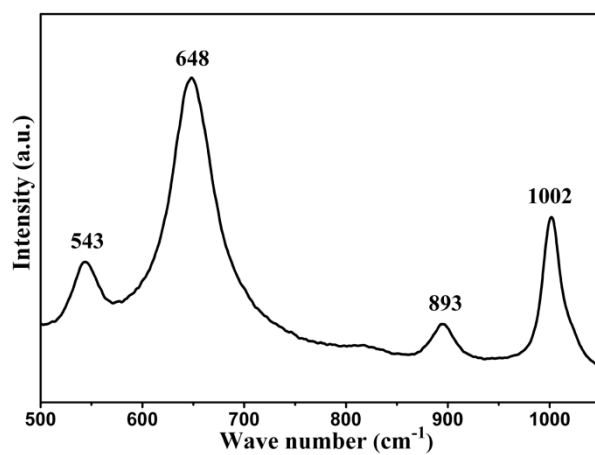

Fig. S3 Raman spectrum of  $\text{Ti}_2\text{Nb}_{10}\text{O}_{29}$

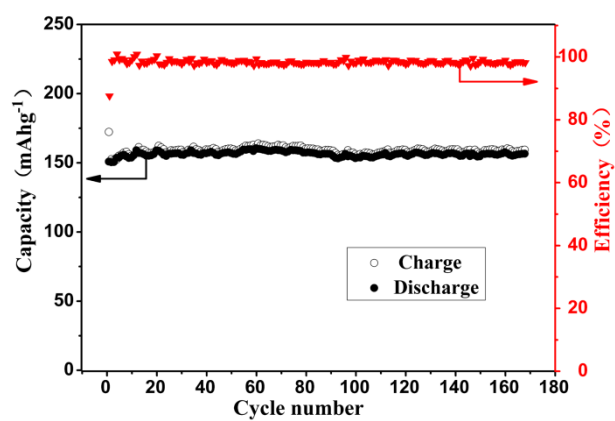

Fig. S4 Cyclic performance of  $\text{LiFePO}_4$  at a current rate of 1C cycled between 2.5 and 4.2 V
